# Supplementary material
Source: MDPI journal article supplement (https://www.mdpi.com/1999-4907/10/3/259)

**Figure S1.** Geographical location of Protected Natural Areas included in the *Phytophthora* survey of forest stands and river systems in Sicily, projected using the Universal Transverse Mercator (UTM).

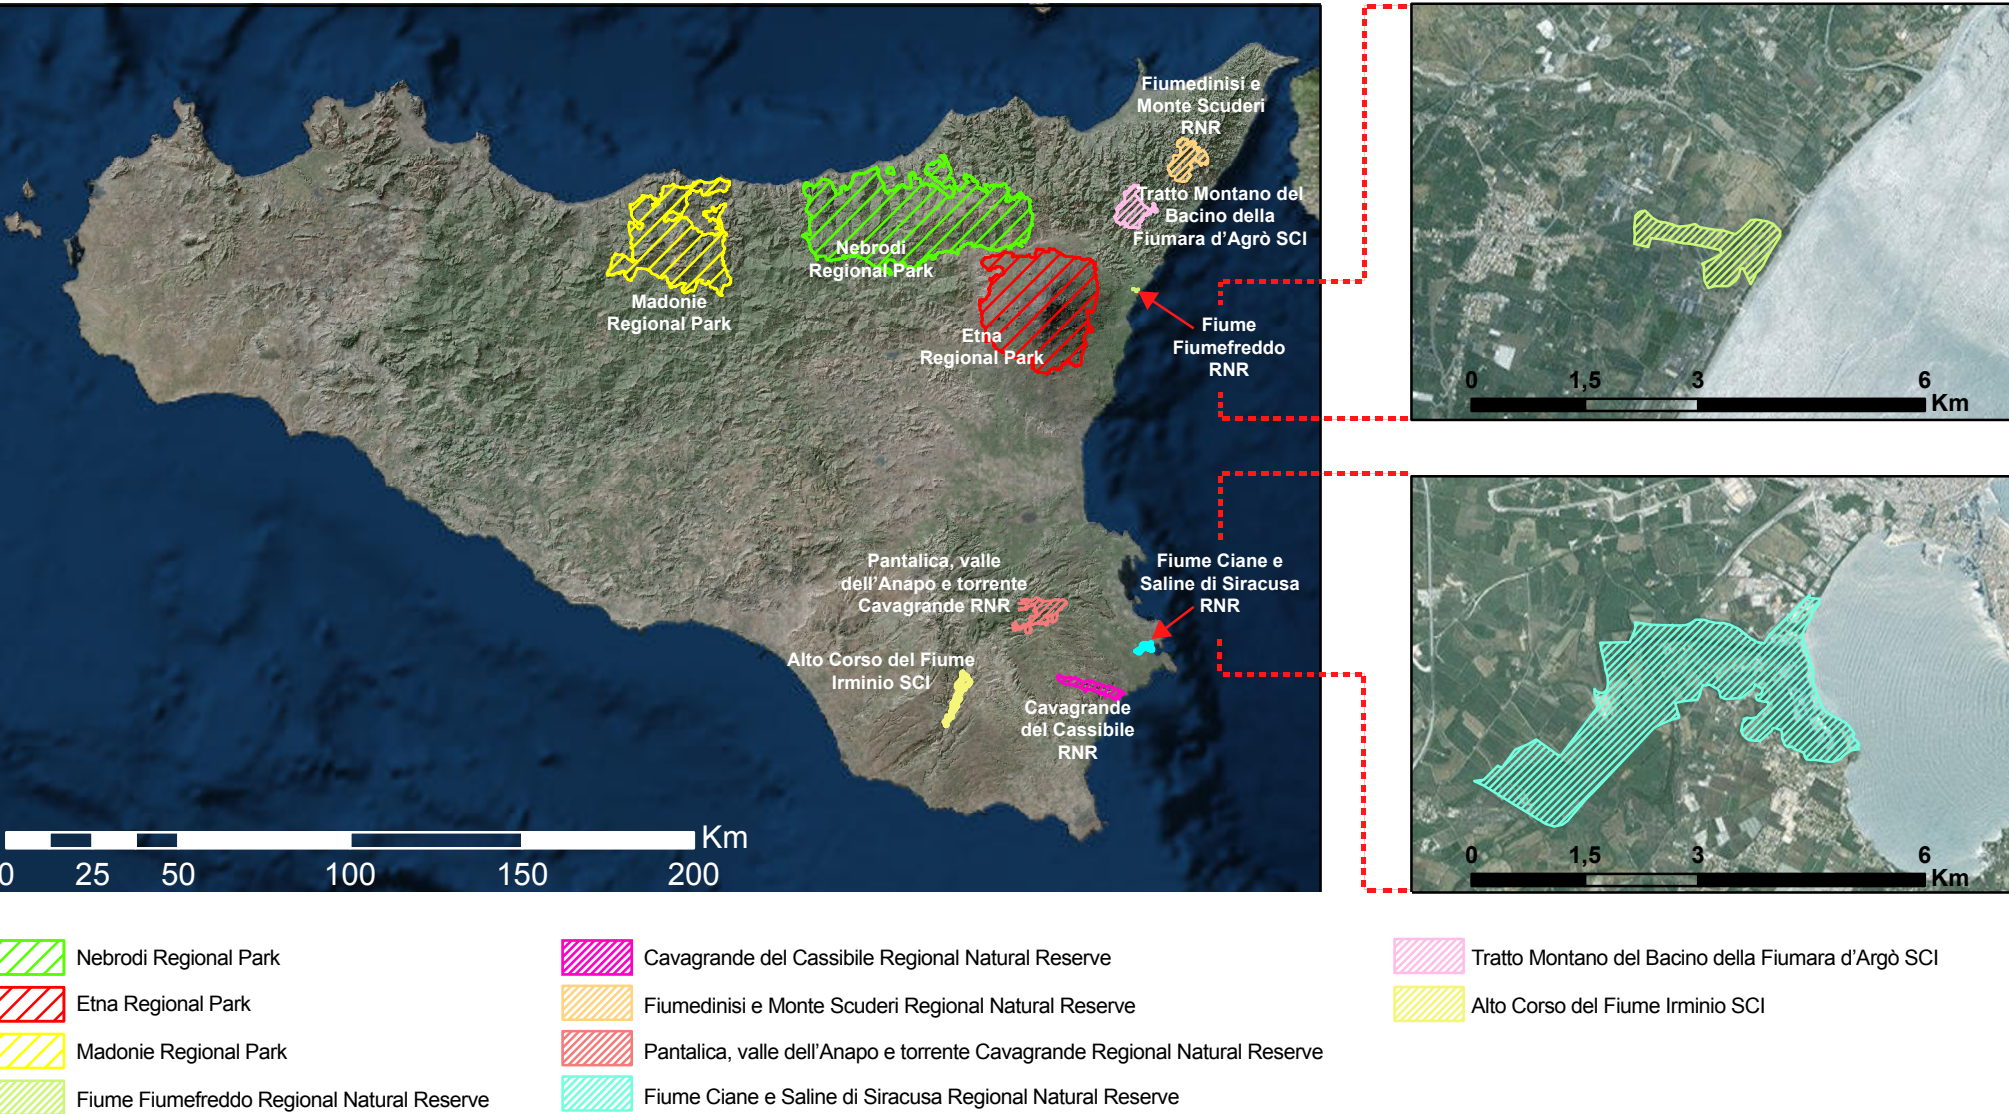

Supplement: s1 [file s1]
