# Supplementary material
Source: MDPI journal article supplement (https://www.mdpi.com/1999-4907/10/3/259)
Supplement: s1 [file s1]

**Table S1.** Geographic location, geomorphological features, land area covered and ecological features of the 10 Protected Natural Areas included in the *Phytophthora* survey in Sicily.

| Protected Natural Area <sup>a</sup> | Geographic Location  | Geomorphological features | Land area covered (km <sup>2</sup> ) | Ecological features <sup>b</sup> (Habitat CODES - Natura 2000 <sup>c</sup> )                                                                                                                                                                                                                                                                                                                                                                                                                                                                                                                                                                                                              | Sites of Community Importance (SCI) and Special Protection Areas (SPA)                                                                                                                                                                          |
|-------------------------------------|----------------------|---------------------------|--------------------------------------|-------------------------------------------------------------------------------------------------------------------------------------------------------------------------------------------------------------------------------------------------------------------------------------------------------------------------------------------------------------------------------------------------------------------------------------------------------------------------------------------------------------------------------------------------------------------------------------------------------------------------------------------------------------------------------------------|-------------------------------------------------------------------------------------------------------------------------------------------------------------------------------------------------------------------------------------------------|
| Etna RP                             | Eastern Sicily       | Volcano                   | 583.62                               | <ul style="list-style-type: none"> <li>• <u>Freshwater habitats</u>: (3130, 3150, 3170, 3280);</li> <li>• <u>Temperate heath and scrub</u>: (4090);</li> <li>• <u>Natural and semi-natural grassland formations</u>: (6220, 6420);</li> <li>• <u>Rocky habitats and caves</u>: (8130, 8220, 8320);</li> <li>• <u>Forests</u>: (91AA, 91M0, 9180, 9220, 9260, 92A0, 9340, 9530, 9560, G1.916<sup>d</sup>).</li> </ul>                                                                                                                                                                                                                                                                      | SCI-ITA070009; SCI-ITA070010; SCI-ITA070012; SCI-ITA070013; SCI-ITA070014; SCI-ITA070019; SCI-ITA070020; SCI-ITA070023; SCI-ITA070024; SCI/SPA-ITA070015; SCI/SPA-ITA070016; SCI/SPA-ITA070017; SCI/SPA-ITA070018.                              |
| Nebrodi RP                          | Northeastern Sicily  | Mountain chain            | 842.58                               | <ul style="list-style-type: none"> <li>• <u>Freshwater habitats</u>: (3130, 3150, 3170, 3260, 3280, 3290);</li> <li>• <u>Temperate heath and scrub</u>: (4090);</li> <li>• <u>Sclerophyllous scrub (matorral)</u>: (5230, 5330);</li> <li>• <u>Natural and semi-natural grassland formations</u>: (6220, 6420, 6430, 6510);</li> <li>• <u>Raised bogs and mires and fens</u>: (7230);</li> <li>• <u>Rocky habitats and caves</u>: (8130, 8210, 8310);</li> <li>• <u>Forests</u>: (91AA, 91M0, 9210, 9260, 92A0, 92D0, 9330, 9340, 9380, 9580).</li> </ul>                                                                                                                                 | SCI-ITA030001; SCI-ITA030002; SCI-ITA030013; SCI-ITA030014; SCI-ITA030015; SCI-ITA030016; SCI-ITA030017; SCI-ITA030018; SCI-ITA030022; SCI-ITA030035; SCI-ITA030038; SCI-ITA030039; SCI-ITA060005; SCI-ITA060008; SCI-ITA070007; SPA-ITA030043. |
| Madonie RP                          | North area of Sicily | Mountain chain            | 402.37                               | <ul style="list-style-type: none"> <li>• <u>Coastal and halophytic habitats</u>: (1210, 1430);</li> <li>• <u>Coastal sand dunes and inland dunes</u>: (2110);</li> <li>• <u>Freshwater habitats</u>: (3120, 3140, 3150, 3290);</li> <li>• <u>Temperate heath and scrub</u>: (4090);</li> <li>• <u>Sclerophyllous scrub (matorral)</u>: (5230, 5330);</li> <li>• <u>Natural and semi-natural grassland formations</u>: (6210; 6220, 6420, 6430, 6510);</li> <li>• <u>Raised bogs and mires and fens</u>: (7140);</li> <li>• <u>Rocky habitats and caves</u>: (8130, 8210, 8310);</li> <li>• <u>Forests</u>: (91AA, 91M0, 9210, 9220, 9260, 92A0, 92D0, 9330, 9340, 9380, 9540).</li> </ul> | SCI-ITA030003; SCI-ITA030004; SCI-ITA030006; SCI-ITA030007; SCI-ITA030008; SCI-ITA030009; SCI-ITA030010; SCI-ITA030011; SCI-ITA030019; SCI-ITA030020; SCI-ITA030021; SCI-ITA030031; SCI-ITA030037; SPA-ITA030042.                               |

| Protected Natural Area <sup>a</sup> | Geographic Location                             | Geomorphological features | Land area covered (km <sup>2</sup> ) | Ecological features <sup>b</sup> (Habitat CODES - Natura 2000 <sup>c</sup> )                                                                                                                                                                                                                                                                                                                                                                                                                              | Sites of Community Importance (SCI) and Special Protection Areas (SPA) |
|-------------------------------------|-------------------------------------------------|---------------------------|--------------------------------------|-----------------------------------------------------------------------------------------------------------------------------------------------------------------------------------------------------------------------------------------------------------------------------------------------------------------------------------------------------------------------------------------------------------------------------------------------------------------------------------------------------------|------------------------------------------------------------------------|
| Fiumefreddo RNR                     | Northeastern coastal plane of Sicily            | Wetland                   | 0.52                                 | <ul style="list-style-type: none"> <li>• <u>Coastal and halophytic habitats</u>: (1210,1410);</li> <li>• <u>Coastal sand dunes and inland dunes</u>: (2110);</li> <li>• <u>Freshwater habitats</u>:(3150, 3260);</li> <li>• <u>Natural and semi-natural grassland formations</u>: (6420);</li> <li>• <u>Forests</u>:(92A0).</li> </ul>                                                                                                                                                                    | SCI-ITA070002.                                                         |
| Cavagrande RNR                      | Southeastern Sicily                             | River valley              | 27.81                                | <ul style="list-style-type: none"> <li>• <u>Coastal and halophytic habitats</u>: (1240);</li> <li>• <u>Freshwater habitats</u>: (3140; 3280, 3290);</li> <li>• <u>Sclerophyllous scrub (matorral)</u>: (5330, 5420);</li> <li>• <u>Natural and semi-natural grassland formations</u>: (6220);</li> <li>• <u>Raised bogs and mires and fens</u>: (7210, 7220);</li> <li>• <u>Rocky habitats and caves</u>: (8130, 8210, 8310);</li> <li>• <u>Forests</u>: (91AA, 92A0, 92C0, 92D0, 9320, 9340).</li> </ul> | SCI-ITA090007.                                                         |
| Fiumedinisi RNR                     | North-eastern area of Peloritani Mountain chain | River valley              | 45.87                                | <ul style="list-style-type: none"> <li>• <u>Freshwater habitats</u>:(3260, 3290);</li> <li>• <u>Temperate heath and scrub</u>: (4090);</li> <li>• <u>Sclerophyllous scrub (matorral)</u>: (5330);</li> <li>• <u>Natural and semi-natural grassland formations</u>: (6220, 6430, 6510);</li> <li>• <u>Raised bogs and mires and fens</u>: (7220);</li> <li>• <u>Rocky habitats and caves</u>: (8130, 8210, 8220, 8310);</li> <li>• <u>Forests</u>: (9180, 91AA, 91E0, 9260, 92A0, 92C0, 9340).</li> </ul>  | SCI-ITA030010.                                                         |
| Pantalica RNR                       | Southeastern Sicily                             | River Valley              | 39.88                                | <ul style="list-style-type: none"> <li>• <u>Freshwater habitats</u>:(3140, 3170; 3280);</li> <li>• <u>Sclerophyllous scrub (matorral)</u>: (5330, 5420);</li> <li>• <u>Natural and semi-natural grassland formations</u>: (6220, 6420);</li> <li>• <u>Raised bogs and mires and fens</u>:(7220);</li> <li>• <u>Rocky habitats and caves</u>: (8210, 8310);</li> <li>• <u>Forests</u>: (91AA, 92C0, 9320, 9340).</li> </ul>                                                                                | SCI-ITA090009                                                          |

| Protected Natural Area <sup>a</sup> | Geographic Location                            | Geomorphological features | Land area covered (km <sup>2</sup> ) | Ecological features <sup>b</sup> (Habitat CODES - Natura 2000 <sup>c</sup> )                                                                                                                                                                                                                                                                                       | Sites of Community Importance (SCI) and Special Protection Areas (SPA) |
|-------------------------------------|------------------------------------------------|---------------------------|--------------------------------------|--------------------------------------------------------------------------------------------------------------------------------------------------------------------------------------------------------------------------------------------------------------------------------------------------------------------------------------------------------------------|------------------------------------------------------------------------|
| Ciane RNR                           | Southeastern coastal plane of Sicily           | Wetland                   | 3.33                                 | <ul style="list-style-type: none"> <li>• <u>Coastal and halophytic habitats</u>: (1150, 1240, 1310, 1410, 1420);</li> <li>• <u>Freshwater habitats</u>: (3140, 3170, 3280);</li> <li>• <u>Sclerophyllous scrub (matorral)</u>: (5330);</li> <li>• <u>Natural and semi-natural grassland formations</u>: (6220);</li> <li>• <u>Forests</u>: (92A0).</li> </ul>      | SCI-ITA090006                                                          |
| Agrò SCI                            | Southeastern area of Peloritani Mountain chain | River valley              | 45.36                                | <ul style="list-style-type: none"> <li>• <u>Freshwater habitats</u>: (3270, 3290);</li> <li>• <u>Sclerophyllous scrub (matorral)</u>: (5330);</li> <li>• <u>Natural and semi-natural grassland formations</u>: (6220, 6510);</li> <li>• <u>Rocky habitats and caves</u>: (8130, 8210, 8310);</li> <li>• <u>Forests</u>: (91AA, 91E0, 92A0, 92C0, 9340).</li> </ul> | -                                                                      |
| Irminio SCI                         | Southeastern Sicily                            | River valley              | 12.55                                | <ul style="list-style-type: none"> <li>• <u>Freshwater habitats</u>: (3140, 3280);</li> <li>• <u>Sclerophyllous scrub (matorral)</u>: (5230, 5330);</li> <li>• <u>Natural and semi-natural grassland formations</u>: (6220);</li> <li>• <u>Rocky habitats and caves</u>: (8210, 8310);</li> <li>• <u>Forests</u>: (91AA, 92A0, 92C0, 92D0, 9340).</li> </ul>       | -                                                                      |

<sup>a</sup> Etna RP = Etna Regional Park; Nebrodi RP = Nebrodi Regional Park; Madonie RP = Madonie Regional Park; Fiumefreddo RNR = Fiumefreddo Regional Natural Reserve (RNR); Cavagrande RNR = Cavagrande del Cassibile RNR; Fiumedinisi RNR = Fiume Fiumedinisi e Monte Scuderi RNR; Pantalica RNR = Pantalica, Valle dell'Anapo e Torrente Cavagrande RNR; Ciane RNR = Fiume Ciane e Saline di Siracusa RNR; Agrò SCI = ITA030019 - Tratto Montano del Bacino della Fiumara di Agrò Site of Community Importance (SCI); Irminio SCI = ITA080002 - Alto corso del Fiume Irminio SCI.

<sup>b</sup> Ecological features were in accordance with Natura 2000 Sites Data and respective Management Plans:  
[http://ftp.minambiente.it/PNM/Natura2000/TrasmissioneCE\\_2016/schede\\_mappe/Sicilia/SIC\\_schede/](http://ftp.minambiente.it/PNM/Natura2000/TrasmissioneCE_2016/schede_mappe/Sicilia/SIC_schede/)

<sup>c</sup> Natura 2000 Habitats: [http://www.minambiente.it/sites/default/files/archivio/allegati/rete\\_natura\\_2000/int\\_manual\\_eu28.pdf](http://www.minambiente.it/sites/default/files/archivio/allegati/rete_natura_2000/int_manual_eu28.pdf)

<sup>d</sup> EUNIS Habitat: <http://eunis.eea.europa.eu/habitats/1176>
