# Supplementary material
Source: MDPI journal article supplement (https://www.mdpi.com/1999-4907/10/3/259)

**Figure S3.** Distribution of phylogenetic *Phytophthora* Clades in baited river systems and protected natural areas in Sicily. (a) Etna RP = Etna Regional Park; Nebrodi RP = Nebrodi Regional Park; Madonie RP = Madonie Regional Park; Pantalica RNR = Pantalica, Valle dell'Anapo e Torrente Cavagrande Regional Natural Reserve (RNR); Ciane RNR = Fiume Ciane e Saline di Siracusa RNR; Cavagrande RNR = Cavagrande del Cassibile RNR; Fiumedinisi RNR = Fiume Fiumedinisi e Monte Scuderi RNR; Agrò SCI = ITA030019 - Tratto Montano del Bacino della Fiumara di Agrò - Site of Community Importance (SCI); Irmínio SCI = ITA080002 - Alto corso del Fiume Irmínio SCI, (b) isolation frequency (%) of phylogenetic *Phytophthora* Clades from baiting rafts, (c) proportion (%) of *Phytophthora* Clades present in individual baited rivers, (d) proportion (%) of rivers from which phylogenetic *Phytophthora* Clades were isolated, (e) proportion (%) of natural protected areas from which phylogenetic *Phytophthora* Clades were isolated, (f) proportion (%) of *Phytophthora* Clades present in rivers of individual protected natural areas.

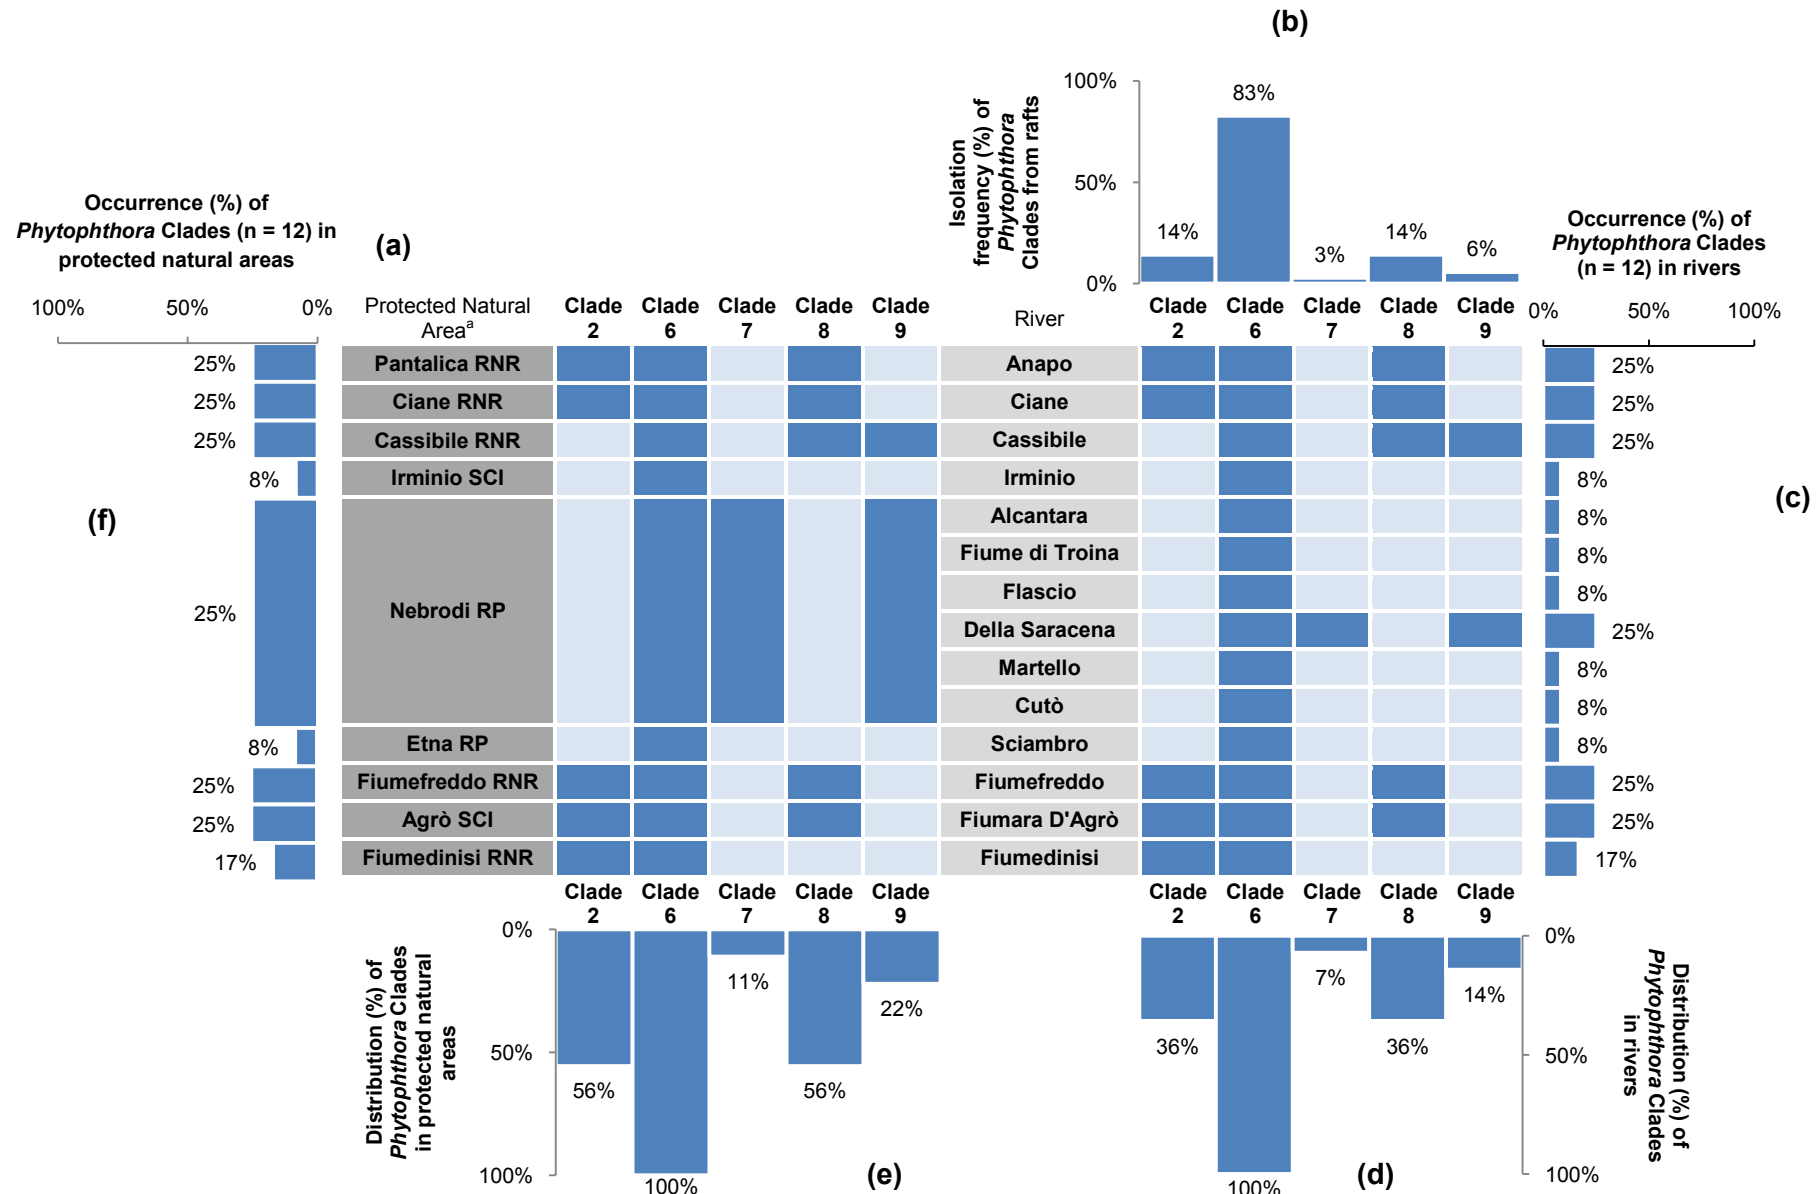

Supplement: s1 [file s1]
