# Supplementary material
Source: MDPI journal article supplement (https://www.mdpi.com/1999-4907/10/3/259)
Supplement: s1 [file s1]

**Table S2.** Isolate details and GenBank accession numbers of *Phytophthora* isolates obtained during the *Phytophthora* survey of forest stands and river systems in 10 Protected Natural Areas in Sicily.

| <i>Phytophthora</i> species | Isolate code | Source     | Host                           | Protected Natural Area <sup>a</sup> | Forest type/river | Municipality       | Isolation date | GenBank accession no. of ITS sequence |
|-----------------------------|--------------|------------|--------------------------------|-------------------------------------|-------------------|--------------------|----------------|---------------------------------------|
| <i>P. cactorum</i>          | XI/4K4       | Rhiz. Soil | <i>Platanus orientalis</i>     | Pantalica RNR                       | Riparian forest   | Sortino (SR)       | Mar-2015       | MG594643                              |
|                             | XI/4Ka       | Rhiz. Soil | <i>P. orientalis</i>           | Pantalica RNR                       | Riparian forest   | Sortino (SR)       | Mar-2015       | MG594644                              |
|                             | XII/1K8      | Rhiz. Soil | <i>Populus nigra</i>           | Pantalica RNR                       | Riparian forest   | Sortino (SR)       | Mar-2015       | MG594645                              |
|                             | XV/3K3       | Rhiz. Soil | <i>P. orientalis</i>           | Cavagrande RNR                      | Riparian forest   | Siracusa (SR)      | Apr-2015       | MG594646                              |
| <i>P. citricola</i> 12      | XVI/2K1      | Rhiz. Soil | <i>Quercus pubescens</i> s. l. | Irminio SCI                         | Riparian forest   | Ragusa (RG)        | Apr-2015       | MH382110                              |
| <i>P. citrophthora</i>      | XIV/2Q2      | Rhiz. soil | <i>P. orientalis</i>           | Pantalica RNR                       | Riparian forest   | Sortino (SR)       | Apr-2015       | MG551856                              |
|                             | XIV/2Q6      | Rhiz. soil | <i>P. orientalis</i>           | Pantalica RNR                       | Riparian forest   | Sortino (SR)       | Apr-2015       | MG551857                              |
|                             | R3K6-2       | Water      |                                | Pantalica RNR                       | Anapo river       | Sortino (SR)       | Apr-2015       | MG551884                              |
|                             | R35K11-1     | Water      |                                | Fiumedinisi RNR                     | Fiumedinisi river | Limina (ME)        | May-2015       | MG551881                              |
|                             | R35K6b       | Water      |                                | Fiumedinisi RNR                     | Fiumedinisi river | Limina (ME)        | May-2015       | MG551882                              |
|                             | R35K9a       | Water      |                                | Fiumedinisi RNR                     | Fiumedinisi river | Limina (ME)        | May-2015       | MG551883                              |
| <i>P. crassamura</i>        | XIII/1Ka     | Rhiz. Soil | <i>Fraxinus oxycarpa</i>       | Ciane RNR                           | Riparian forest   | Siracusa (SR)      | Mar-2015       | MG554691                              |
| <i>P. frigida</i>           | R6K16        | Water      |                                | Ciane RNR                           | Ciane river       | Siracusa (SR)      | Apr-2015       | MH382109                              |
| <i>P. gonapodyides</i>      | VII/1a       | Rhiz. Soil | <i>Quercus ilex</i>            | Nebrodi RP                          | Mesophilic forest | San Fratello (ME)  | May-2013       | MG553209                              |
|                             | VII/1cGON    | Rhiz. Soil | <i>Q. ilex</i>                 | Nebrodi RP                          | Mesophilic forest | San Fratello (ME)  | May-2013       | MG553210                              |
|                             | VII/1d       | Rhiz. Soil | <i>Q. ilex</i>                 | Nebrodi RP                          | Mesophilic forest | San Fratello (ME)  | May-2013       | MG553211                              |
|                             | VII/1e       | Rhiz. Soil | <i>Q. ilex</i>                 | Nebrodi RP                          | Mesophilic forest | San Fratello (ME)  | May-2013       | MG553212                              |
|                             | VII/1f       | Rhiz. Soil | <i>Q. ilex</i>                 | Nebrodi RP                          | Mesophilic forest | San Fratello (ME)  | May-2013       | MG553213                              |
|                             | VII/1g       | Rhiz. Soil | <i>Q. ilex</i>                 | Nebrodi RP                          | Mesophilic forest | San Fratello (ME)  | May-2013       | MG553214                              |
|                             | VII/4L1      | Rhiz. Soil | <i>Q. ilex</i>                 | Nebrodi RP                          | Mesophilic forest | San Fratello (ME)  | May-2013       | MG553215                              |
|                             | VII/1b       | Rhiz. Soil | <i>Q. ilex</i>                 | Nebrodi RP                          | Mesophilic forest | San Fratello (ME)  | May-2013       | MG553216                              |
|                             | VII/4L3      | Rhiz. Soil | <i>Q. ilex</i>                 | Nebrodi RP                          | Mesophilic forest | San Fratello (ME)  | May-2013       | MG553217                              |
|                             | VII/4L4      | Rhiz. Soil | <i>Q. ilex</i>                 | Nebrodi RP                          | Mesophilic forest | San Fratello (ME)  | May-2013       | MG553218                              |
|                             | 17/3F1       | Rhiz. Soil | <i>Quercus suber</i>           | Madonie RP                          | Mesophilic forest | Geraci Siculo (PA) | May-2015       | MG553201                              |
|                             | 17/3Fa       | Rhiz. Soil | <i>Q. suber</i>                | Madonie RP                          | Mesophilic forest | Geraci Siculo (PA) | May-2015       | MG553202                              |
|                             | 17/3K2       | Rhiz. Soil | <i>Q. suber</i>                | Madonie RP                          | Mesophilic forest | Geraci Siculo (PA) | May-2015       | MG553203                              |
|                             | 17/4F5d      | Rhiz. Soil | <i>Q. suber</i>                | Madonie RP                          | Mesophilic forest | Geraci Siculo (PA) | May-2015       | MG553204                              |
|                             | 17/4F7d      | Rhiz. Soil | <i>Q. suber</i>                | Madonie RP                          | Mesophilic forest | Geraci Siculo (PA) | May-2015       | MG553205                              |
|                             | 17/4F8       | Rhiz. Soil | <i>Q. suber</i>                | Madonie RP                          | Mesophilic forest | Geraci Siculo (PA) | May-2015       | MG553206                              |
|                             | 17/4F9f      | Rhiz. Soil | <i>Q. suber</i>                | Madonie RP                          | Mesophilic forest | Geraci Siculo (PA) | May-2015       | MG553207                              |

| <i>Phytophthora</i><br>species | Isolate code        | Source     | Host                                                 | Protected Natural<br>Area <sup>a</sup> | Forest type/river    | Municipality       | Isolation<br>date | GenBank<br>accession<br>no. of ITS<br>sequence |
|--------------------------------|---------------------|------------|------------------------------------------------------|----------------------------------------|----------------------|--------------------|-------------------|------------------------------------------------|
| <i>P. gonapodyides</i>         | 17/4K3b             | Rhiz. Soil | <i>Q. suber</i>                                      | Madonie RP                             | Mesophilic forest    | Geraci Siculo (PA) | May-2015          | MG553208                                       |
|                                | R18C6a              | Water      |                                                      | Nebrodi                                | Alcantara river      | Randazzo (CT)      | Apr-2015          | MG552076                                       |
|                                | R22C10b1            | Water      |                                                      | Nebrodi RP                             | Della Saracena river | Bronte (CT)        | Apr-2015          | MG552077                                       |
|                                | R22C3               | Water      |                                                      | Nebrodi RP                             | Della Saracena river | Bronte (CT)        | Apr-2015          | MG552078                                       |
|                                | R25C2               | Water      |                                                      | Nebrodi RP                             | Della Saracena river | Maniace (CT)       | May-2015          | MG552079                                       |
|                                | R25C3               | Water      |                                                      | Nebrodi RP                             | Della Saracena river | Maniace (CT)       | May-2015          | MG552080                                       |
|                                | R27I4               | Water      |                                                      | Etna RP                                | Sciambro river       | Linguaglossa (CT)  | May 2015          | MG552081                                       |
|                                | R27I6a              | Water      |                                                      | Etna RP                                | Sciambro river       | Linguaglossa (CT)  | May 2015          | MG552082                                       |
|                                | R27I8               | Water      |                                                      | Etna RP                                | Sciambro river       | Linguaglossa (CT)  | May 2015          | MG552083                                       |
|                                | R27I9               | Water      |                                                      | Etna RP                                | Sciambro river       | Linguaglossa (CT)  | May 2015          | MG552084                                       |
|                                | R27K1a              | Water      |                                                      | Etna RP                                | Sciambro river       | Linguaglossa (CT)  | May 2015          | MG552085                                       |
|                                | R29C2               | Water      |                                                      | Etna RP                                | Sciambro river       | Linguaglossa (CT)  | May 2015          | MG552086                                       |
|                                | R29K1               | Water      |                                                      | Etna RP                                | Sciambro river       | Linguaglossa (CT)  | May 2015          | MG552087                                       |
|                                | R29K3b              | Water      |                                                      | Etna RP                                | Sciambro river       | Linguaglossa (CT)  | May 2015          | MG552088                                       |
|                                | R29K4               | Water      |                                                      | Etna RP                                | Sciambro river       | Linguaglossa (CT)  | May 2015          | MG552089                                       |
| <i>P. hydropathica</i>         | R13Q10              | Water      |                                                      | Cavagrande RNR                         | Cavagrande river     | Siracusa (SR)      | Apr-2015          | MG554683                                       |
|                                | R14Q3c              | Water      |                                                      | Cavagrande RNR                         | Cavagrande river     | Siracusa (SR)      | Apr-2015          | MG554684                                       |
|                                | R14Q8               | Water      |                                                      | Cavagrande RNR                         | Cavagrande river     | Siracusa (SR)      | Apr-2015          | MG554685                                       |
| <i>P. lacustris</i>            | XI/3K7a             | Rhiz. Soil | <i>Q. ilex</i> + <i>F. oxycarpa</i> , mixed sample   | Pantalica RNR                          | Riparian forest      | Sortino (SR)       | Mar-2015          | MG550122                                       |
|                                | XI/5K3a             | Rhiz. Soil | <i>Ostrya carpinifolia</i>                           | Pantalica RNR                          | Riparian forest      | Sortino (SR)       | Mar-2015          | MG550123                                       |
|                                | XI/6K2              | Rhiz. Soil | <i>P. orientalis</i> + <i>Q. ilex</i> , mixed sample | Pantalica RNR                          | Riparian forest      | Sortino (SR)       | Mar-2015          | MG550124                                       |
|                                | XII/2K1b2           | Rhiz. Soil | <i>Populus alba</i>                                  | Pantalica RNR                          | Riparian forest      | Sortino (SR)       | Mar-2015          | MG550125                                       |
|                                | XII/2K5c            | Rhiz. Soil | <i>P. alba</i>                                       | Pantalica RNR                          | Riparian forest      | Sortino (SR)       | Mar-2015          | MG550126                                       |
|                                | XII/2K5c type-6 (a) | Rhiz. Soil | <i>P. alba</i>                                       | Pantalica RNR                          | Riparian forest      | Sortino (SR)       | Mar-2015          | MG550127                                       |
|                                | XII/2K8c            | Rhiz. Soil | <i>P. alba</i>                                       | Pantalica RNR                          | Riparian forest      | Sortino (SR)       | Mar-2015          | MG550128                                       |
|                                | XII/3K1b            | Rhiz. Soil | <i>Salix pedicellata</i>                             | Pantalica RNR                          | Riparian forest      | Sortino (SR)       | Mar-2015          | MG523188                                       |
|                                | XII/3K5a            | Rhiz. Soil | <i>S. pedicellata</i>                                | Pantalica RNR                          | Riparian forest      | Sortino (SR)       | Mar-2015          | MG550129                                       |
|                                | XIII/2K4            | Rhiz. Soil | <i>F. oxycarpa</i>                                   | Ciane RNR                              | Riparian forest      | Siracusa (SR)      | Mar-2015          | MG550130                                       |
|                                | XIII/3A4            | Rhiz. Soil | <i>F. oxycarpa</i>                                   | Ciane RNR                              | Riparian forest      | Siracusa (SR)      | Mar-2015          | MG550131                                       |
|                                | XIII/3Ab            | Rhiz. Soil | <i>F. oxycarpa</i>                                   | Ciane RNR                              | Riparian forest      | Siracusa (SR)      | Mar-2015          | MG550132                                       |
|                                | XIII/3K12           | Rhiz. Soil | <i>F. oxycarpa</i>                                   | Ciane RNR                              | Riparian forest      | Siracusa (SR)      | Mar-2015          | MG550133                                       |
|                                | XIII/3K1            | Rhiz. Soil | <i>F. oxycarpa</i>                                   | Ciane RNR                              | Riparian forest      | Siracusa (SR)      | Mar-2015          | MG550134                                       |
|                                | XIII/3K4            | Rhiz. Soil | <i>F. oxycarpa</i>                                   | Ciane RNR                              | Riparian forest      | Siracusa (SR)      | Mar-2015          | MG550135                                       |
|                                | XIII/3K5            | Rhiz. Soil | <i>F. oxycarpa</i>                                   | Ciane RNR                              | Riparian forest      | Siracusa (SR)      | Mar-2015          | MG550136                                       |
|                                | XIV/2Q13b           | Rhiz. Soil | <i>P. orientalis</i>                                 | Pantalica RNR                          | Riparian forest      | Sortino (SR)       | Apr-2015          | MG550137                                       |
|                                | XIV/3K1             | Rhiz. Soil | <i>P. orientalis</i>                                 | Pantalica RNR                          | Riparian forest      | Sortino (SR)       | Apr-2015          | MG550138                                       |
|                                | XIV/3Q2             | Rhiz. Soil | <i>P. orientalis</i>                                 | Pantalica RNR                          | Riparian forest      | Sortino (SR)       | Apr-2015          | MG550139                                       |
|                                | XV/1K1              | Rhiz. Soil | <i>Salix caprea</i>                                  | Cavagrande RNR                         | Riparian forest      | Siracusa (SR)      | Apr-2015          | MG550140                                       |
|                                | XV/1K2a             | Rhiz. Soil | <i>S. caprea</i>                                     | Cavagrande RNR                         | Riparian forest      | Siracusa (SR)      | Apr-2015          | MG550141                                       |

| <i>Phytophthora</i><br>species | Isolate code | Source     | Host             | Protected Natural<br>Area <sup>a</sup> | Forest type/river | Municipality  | Isolation<br>date | GenBank<br>accession<br>no. of ITS<br>sequence |
|--------------------------------|--------------|------------|------------------|----------------------------------------|-------------------|---------------|-------------------|------------------------------------------------|
| <i>P. lacustris</i>            | XV/1K3a      | Rhiz. Soil | <i>S. caprea</i> | Cavagrande RNR                         | Riparian forest   | Siracusa (SR) | Apr-2015          | MG550142                                       |
|                                | XV/2K3       | Rhiz. Soil | <i>S. caprea</i> | Cavagrande RNR                         | Riparian forest   | Siracusa (SR) | Apr-2015          | MG550143                                       |
|                                | XV/2K7       | Rhiz. Soil | <i>S. caprea</i> | Cavagrande RNR                         | Riparian forest   | Siracusa (SR) | Apr-2015          | MG550144                                       |
|                                | XV/2Q2a      | Rhiz. Soil | <i>S. caprea</i> | Cavagrande RNR                         | Riparian forest   | Siracusa (SR) | Apr-2015          | MG550145                                       |
|                                | R1P1a type-6 | Water      |                  | Pantalica RNR                          | Anapo river       | Sortino (SR)  | Apr-2015          | MG549065                                       |
|                                | R1P1a type-1 | Water      |                  | Pantalica RNR                          | Anapo river       | Sortino (SR)  | Apr-2015          | MG549066                                       |
|                                | R1P1b        | Water      |                  | Pantalica RNR                          | Anapo river       | Sortino (SR)  | Apr-2015          | MG549067                                       |
|                                | R1P2         | Water      |                  | Pantalica RNR                          | Anapo river       | Sortino (SR)  | Apr-2015          | MG549068                                       |
|                                | R1P2d        | Water      |                  | Pantalica RNR                          | Anapo river       | Sortino (SR)  | Apr-2015          | MG549069                                       |
|                                | R1P2f        | Water      |                  | Pantalica RNR                          | Anapo river       | Sortino (SR)  | Apr-2015          | MG549070                                       |
|                                | R1P4b        | Water      |                  | Pantalica RNR                          | Anapo river       | Sortino (SR)  | Apr-2015          | MG549071                                       |
|                                | R1P5a        | Water      |                  | Pantalica RNR                          | Anapo river       | Sortino (SR)  | Apr-2015          | MG549072                                       |
|                                | R1P5c        | Water      |                  | Pantalica RNR                          | Anapo river       | Sortino (SR)  | Apr-2015          | MG549073                                       |
|                                | R2K2         | Water      |                  | Pantalica RNR                          | Anapo River       | Sortino (SR)  | Apr-2015          | MG547786                                       |
|                                | R2P2         | Water      |                  | Pantalica RNR                          | Anapo River       | Sortino (SR)  | Apr-2015          | MG547787                                       |
|                                | R2P3         | Water      |                  | Pantalica RNR                          | Anapo river       | Sortino (SR)  | Apr-2015          | MG543911                                       |
|                                | R3K8         | Water      |                  | Pantalica RNR                          | Anapo river       | Sortino (SR)  | Apr-2015          | MG547802                                       |
|                                | R3P7         | Water      |                  | Pantalica RNR                          | Anapo river       | Sortino (SR)  | Apr-2015          | MG547803                                       |
|                                | R5K2         | Water      |                  | Ciane RNR                              | Ciane river       | Siracusa (SR) | Apr-2015          | MG547804                                       |
|                                | R5K3a        | Water      |                  | Ciane RNR                              | Ciane river       | Siracusa (SR) | Apr-2015          | MG547805                                       |
|                                | R5P1b        | Water      |                  | Ciane RNR                              | Ciane river       | Siracusa (SR) | Apr-2015          | MG547806                                       |
|                                | R5P3         | Water      |                  | Ciane RNR                              | Ciane river       | Siracusa (SR) | Apr-2015          | MG547807                                       |
|                                | R5P5         | Water      |                  | Ciane RNR                              | Ciane river       | Siracusa (SR) | Apr-2015          | MG547808                                       |
|                                | R6A14b       | Water      |                  | Ciane RNR                              | Ciane river       | Siracusa (SR) | Apr-2015          | MG547809                                       |
|                                | R6A19        | Water      |                  | Ciane RNR                              | Ciane river       | Siracusa (SR) | Apr-2015          | MG547810                                       |
|                                | R6A2a        | Water      |                  | Ciane RNR                              | Ciane river       | Siracusa (SR) | Apr-2015          | MG547811                                       |
|                                | R6A3a        | Water      |                  | Ciane RNR                              | Ciane river       | Siracusa (SR) | Apr-2015          | MG547812                                       |
|                                | R6K1a        | Water      |                  | Ciane RNR                              | Ciane river       | Siracusa (SR) | Apr-2015          | MG547813                                       |
|                                | R6K1b        | Water      |                  | Ciane RNR                              | Ciane river       | Siracusa (SR) | Apr-2015          | MG547814                                       |
|                                | R6K7a        | Water      |                  | Ciane RNR                              | Ciane river       | Siracusa (SR) | Apr-2015          | MG547815                                       |
|                                | R6P2         | Water      |                  | Ciane RNR                              | Ciane river       | Siracusa (SR) | Apr-2015          | MG547816                                       |
|                                | R6A13        | Water      |                  | Ciane RNR                              | Ciane river       | Siracusa (SR) | Apr-2015          | MG547817                                       |
|                                | R6A18        | Water      |                  | Ciane RNR                              | Ciane river       | Siracusa (SR) | Apr-2015          | MG547818                                       |
|                                | R6K4         | Water      |                  | Ciane RNR                              | Ciane river       | Siracusa (SR) | Apr-2015          | MG547819                                       |
|                                | R6K6         | Water      |                  | Ciane RNR                              | Ciane river       | Siracusa (SR) | Apr-2015          | MG547820                                       |
|                                | R6P1         | Water      |                  | Ciane RNR                              | Ciane river       | Siracusa (SR) | Apr-2015          | MG547821                                       |
|                                | R7A3         | Water      |                  | Ciane RNR                              | Ciane river       | Siracusa (SR) | Apr-2015          | MG547822                                       |
|                                | R7O3         | Water      |                  | Ciane RNR                              | Ciane river       | Siracusa (SR) | Apr-2015          | MG547823                                       |
|                                | R7A18        | Water      |                  | Ciane RNR                              | Ciane river       | Siracusa (SR) | Apr-2015          | MG547824                                       |

| <i>Phytophthora</i><br>species | Isolate code | Source | Host | Protected Natural<br>Area <sup>a</sup> | Forest type/river | Municipality  | Isolation<br>date | GenBank<br>accession<br>no. of ITS<br>sequence |
|--------------------------------|--------------|--------|------|----------------------------------------|-------------------|---------------|-------------------|------------------------------------------------|
| <i>P. lacustris</i>            | R7A20a       | Water  |      | Ciane RNR                              | Ciane river       | Siracusa (SR) | Apr-2015          | MG547825                                       |
|                                | R7A2         | Water  |      | Ciane RNR                              | Ciane river       | Siracusa (SR) | Apr-2015          | MG547826                                       |
|                                | R7A7         | Water  |      | Ciane RNR                              | Ciane river       | Siracusa (SR) | Apr-2015          | MG547827                                       |
|                                | R7A8         | Water  |      | Ciane RNR                              | Ciane river       | Siracusa (SR) | Apr-2015          | MG547828                                       |
|                                | R7K13        | Water  |      | Ciane RNR                              | Ciane river       | Siracusa (SR) | Apr-2015          | MG547829                                       |
|                                | R7K3         | Water  |      | Ciane RNR                              | Ciane river       | Siracusa (SR) | Apr-2015          | MG547830                                       |
|                                | R7K7a        | Water  |      | Ciane RNR                              | Ciane river       | Siracusa (SR) | Apr-2015          | MG547831                                       |
|                                | R7O1         | Water  |      | Ciane RNR                              | Ciane river       | Siracusa (SR) | Apr-2015          | MG547832                                       |
|                                | R7O3a        | Water  |      | Ciane RNR                              | Ciane river       | Siracusa (SR) | Apr-2015          | MG547833                                       |
|                                | R7P2         | Water  |      | Ciane RNR                              | Ciane river       | Siracusa (SR) | Apr-2015          | MG547834                                       |
|                                | R7Pyrus      | Water  |      | Ciane RNR                              | Ciane river       | Siracusa (SR) | Apr-2015          | MG547835                                       |
|                                | R8P7         | Water  |      | Ciane RNR                              | Ciane river       | Siracusa (SR) | Apr-2015          | MG547836                                       |
|                                | R8A11a       | Water  |      | Ciane RNR                              | Ciane river       | Siracusa (SR) | Apr-2015          | MG547837                                       |
|                                | R8A13 type-3 | Water  |      | Ciane RNR                              | Ciane river       | Siracusa (SR) | Apr-2015          | MG547838                                       |
|                                | R8A13 type-1 | Water  |      | Ciane RNR                              | Ciane river       | Siracusa (SR) | Apr-2015          | MG547839                                       |
|                                | R8A16        | Water  |      | Ciane RNR                              | Ciane river       | Siracusa (SR) | Apr-2015          | MG547840                                       |
|                                | R8A17        | Water  |      | Ciane RNR                              | Ciane river       | Siracusa (SR) | Apr-2015          | MG547841                                       |
|                                | R8A2b        | Water  |      | Ciane RNR                              | Ciane river       | Siracusa (SR) | Apr-2015          | MG547842                                       |
|                                | R8A3b        | Water  |      | Ciane RNR                              | Ciane river       | Siracusa (SR) | Apr-2015          | MG547843                                       |
|                                | R8A5a        | Water  |      | Ciane RNR                              | Ciane river       | Siracusa (SR) | Apr-2015          | MG547844                                       |
|                                | R8A9         | Water  |      | Ciane RNR                              | Ciane river       | Siracusa (SR) | Apr-2015          | MG547845                                       |
|                                | R8K1 type-11 | Water  |      | Ciane RNR                              | Ciane river       | Siracusa (SR) | Apr-2015          | MG547846                                       |
|                                | R8K1 type-13 | Water  |      | Ciane RNR                              | Ciane river       | Siracusa (SR) | Apr-2015          | MG547847                                       |
|                                | R8K3b        | Water  |      | Ciane RNR                              | Ciane river       | Siracusa (SR) | Apr-2015          | MG547848                                       |
|                                | R8K4a        | Water  |      | Ciane RNR                              | Ciane river       | Siracusa (SR) | Apr-2015          | MG547849                                       |
|                                | R8K4b        | Water  |      | Ciane RNR                              | Ciane river       | Siracusa (SR) | Apr-2015          | MG547850                                       |
|                                | R8P1         | Water  |      | Ciane RNR                              | Ciane river       | Siracusa (SR) | Apr-2015          | MG547851                                       |
|                                | R8P5a        | Water  |      | Ciane RNR                              | Ciane river       | Siracusa (SR) | Apr-2015          | MG547852                                       |
|                                | R8P5b        | Water  |      | Ciane RNR                              | Ciane river       | Siracusa (SR) | Apr-2015          | MG547853                                       |
|                                | R9A13        | Water  |      | Ciane RNR                              | Ciane river       | Siracusa (SR) | Apr-2015          | MG547854                                       |
|                                | R9A1c        | Water  |      | Ciane RNR                              | Ciane river       | Siracusa (SR) | Apr-2015          | MG547855                                       |
|                                | R9A1d        | Water  |      | Ciane RNR                              | Ciane river       | Siracusa (SR) | Apr-2015          | MG547856                                       |
|                                | R9A5         | Water  |      | Ciane RNR                              | Ciane river       | Siracusa (SR) | Apr-2015          | MG547857                                       |
|                                | R9A7         | Water  |      | Ciane RNR                              | Ciane river       | Siracusa (SR) | Apr-2015          | MG547858                                       |
|                                | R9A9         | Water  |      | Ciane RNR                              | Ciane river       | Siracusa (SR) | Apr-2015          | MG547859                                       |
|                                | R9K1         | Water  |      | Ciane RNR                              | Ciane river       | Siracusa (SR) | Apr-2015          | MG547860                                       |
|                                | R9K2         | Water  |      | Ciane RNR                              | Ciane river       | Siracusa (SR) | Apr-2015          | MG547861                                       |
|                                | R9K5a        | Water  |      | Ciane RNR                              | Ciane river       | Siracusa (SR) | Apr-2015          | MG547862                                       |
|                                | R9K8a        | Water  |      | Ciane RNR                              | Ciane river       | Siracusa (SR) | Apr-2015          | MG547863                                       |

| <i>Phytophthora</i><br>species | Isolate code | Source | Host | Protected Natural<br>Area <sup>a</sup> | Forest type/river     | Municipality     | Isolation<br>date | GenBank<br>accession<br>no. of ITS<br>sequence |
|--------------------------------|--------------|--------|------|----------------------------------------|-----------------------|------------------|-------------------|------------------------------------------------|
| <i>P. lacustris</i>            | R9K9b        | Water  |      | Ciane RNR                              | Ciane river           | Siracusa (SR)    | Apr-2015          | MG547864                                       |
|                                | R9P1a        | Water  |      | Ciane RNR                              | Ciane river           | Siracusa (SR)    | Apr-2015          | MG547865                                       |
|                                | R10K2        | Water  |      | Ciane RNR                              | Ciane river           | Siracusa (SR)    | Apr-2015          | MG547866                                       |
|                                | R10K4        | Water  |      | Ciane RNR                              | Ciane river           | Siracusa (SR)    | Apr-2015          | MG547866                                       |
|                                | R10Q1c       | Water  |      | Ciane RNR                              | Ciane river           | Siracusa (SR)    | Apr-2015          | MG549036                                       |
|                                | R10Q2a       | Water  |      | Ciane RNR                              | Ciane river           | Siracusa (SR)    | Apr-2015          | MG549037                                       |
|                                | R10Q2b       | Water  |      | Ciane RNR                              | Ciane river           | Siracusa (SR)    | Apr-2015          | MG549038                                       |
|                                | R10Q3b       | Water  |      | Ciane RNR                              | Ciane river           | Siracusa (SR)    | Apr-2015          | MG549039                                       |
|                                | R10Q7        | Water  |      | Ciane RNR                              | Ciane river           | Siracusa (SR)    | Apr-2015          | MG549040                                       |
|                                | R11K3        | Water  |      | Ciane RNR                              | Ciane river           | Siracusa (SR)    | Apr-2015          | MG549041                                       |
|                                | R11K6b       | Water  |      | Ciane RNR                              | Ciane river           | Siracusa (SR)    | Apr-2015          | MG549042                                       |
|                                | R11Q4        | Water  |      | Ciane RNR                              | Ciane river           | Siracusa (SR)    | Apr-2015          | MG549043                                       |
|                                | R11Q6        | Water  |      | Ciane RNR                              | Ciane river           | Siracusa (SR)    | Apr-2015          | MG549044                                       |
|                                | R12K2        | Water  |      | Ciane RNR                              | Ciane river           | Siracusa (SR)    | Apr-2015          | MG549045                                       |
|                                | R12K1        | Water  |      | Ciane RNR                              | Ciane river           | Siracusa (SR)    | Apr-2015          | MG549046                                       |
|                                | R12Q1a       | Water  |      | Ciane RNR                              | Ciane river           | Siracusa (SR)    | Apr-2015          | MG549047                                       |
|                                | R12Q4        | Water  |      | Ciane RNR                              | Ciane river           | Siracusa (SR)    | Apr-2015          | MG549048                                       |
|                                | R12Q6b       | Water  |      | Ciane RNR                              | Ciane river           | Siracusa (SR)    | Apr-2015          | MG549049                                       |
|                                | R13K1        | Water  |      | Cassibile RNR                          | Cassibile river       | Siracusa (SR)    | Apr-2015          | MG549050                                       |
|                                | R13Q8        | Water  |      | Cassibile RNR                          | Cassibile river       | Siracusa (SR)    | Apr-2015          | MG549051                                       |
|                                | R14K13       | Water  |      | Cassibile RNR                          | Cassibile river       | Siracusa (SR)    | Apr-2015          | MG549052                                       |
|                                | R14K18       | Water  |      | Cassibile RNR                          | Cassibile river       | Siracusa (SR)    | Apr-2015          | MG549053                                       |
|                                | R14K25       | Water  |      | Cassibile RNR                          | Cassibile river       | Siracusa (SR)    | Apr-2015          | MG549054                                       |
|                                | R14K8        | Water  |      | Cassibile RNR                          | Cassibile river       | Siracusa (SR)    | Apr-2015          | MG549055                                       |
|                                | R14Q1        | Water  |      | Cassibile RNR                          | Cassibile river       | Siracusa (SR)    | Apr-2015          | MG549056                                       |
|                                | R14Q2        | Water  |      | Cassibile RNR                          | Cassibile river       | Siracusa (SR)    | Apr-2015          | MG549057                                       |
|                                | R17A3        | Water  |      | Irminio SCI                            | Irminio river         | Ragusa (RG)      | Apr-2015          | MG549058                                       |
|                                | R17A7        | Water  |      | Irminio SCI                            | Irminio river         | Ragusa (RG)      | Apr-2015          | MG549059                                       |
|                                | R17A8        | Water  |      | Irminio SCI                            | Irminio river         | Ragusa (RG)      | Apr-2015          | MG549060                                       |
|                                | R18C8a       | Water  |      | Nebrodi RP                             | Alcantara river       | Randazzo (CT)    | Apr-2015          | MG549061                                       |
|                                | R19C2        | Water  |      | Nebrodi RP                             | Fiume di Troina river | San Teodoro (ME) | Apr-2015          | MG549062                                       |
|                                | R19K3a       | Water  |      | Nebrodi RP                             | Fiume di Troina river | San Teodoro (ME) | Apr-2015          | MG549063                                       |
|                                | R19K8a       | Water  |      | Nebrodi RP                             | Fiume di Troina river | San Teodoro (ME) | Apr-2015          | MG549064                                       |
|                                | R20K4        | Water  |      | Nebrodi RP                             | Flascio river         | Randazzo (CT)    | May-2015          | MG549074                                       |
|                                | R21C6b1      | Water  |      | Nebrodi RP                             | Flascio river         | Randazzo (CT)    | May-2015          | MG549075                                       |
|                                | R21K5a       | Water  |      | Nebrodi RP                             | Flascio river         | Randazzo (CT)    | May-2015          | MG547776                                       |
|                                | R21K8a       | Water  |      | Nebrodi RP                             | Flascio river         | Randazzo (CT)    | May-2015          | MG547777                                       |
|                                | R22C14b      | Water  |      | Nebrodi RP                             | Della Saracena river  | Bronte (CT)      | May-2015          | MG547778                                       |
|                                | R23K10a      | Water  |      | Nebrodi RP                             | Martello river        | Maniace (CT)     | May-2015          | MG547779                                       |

| <i>Phytophthora</i><br>species | Isolate code | Source     | Host                                               | Protected Natural<br>Area <sup>a</sup> | Forest type/river     | Municipality                | Isolation<br>date | GenBank<br>accession<br>no. of ITS<br>sequence |
|--------------------------------|--------------|------------|----------------------------------------------------|----------------------------------------|-----------------------|-----------------------------|-------------------|------------------------------------------------|
| <i>P. lacustris</i>            | R24C6a       | Water      |                                                    | Nebrodi RP                             | Cutò river            | Maniace (CT)                | May-2015          | MG547780                                       |
|                                | R25C1        | Water      |                                                    | Nebrodi RP                             | Della Saracena river  | Maniace (CT)                | May-2015          | MG547781                                       |
|                                | R25K4a       | Water      |                                                    | Nebrodi RP                             | Della Saracena river  | Maniace (CT)                | May-2015          | MG547782                                       |
|                                | R25K5a       | Water      |                                                    | Nebrodi RP                             | Della Saracena river  | Maniace (CT)                | May-2015          | MG547783                                       |
|                                | R26K11       | Water      |                                                    | Nebrodi RP                             | Fiume di Troina river | San Teodoro (ME)            | May-2015          | MG547784                                       |
|                                | R26K13       | Water      |                                                    | Nebrodi RP                             | Fiume di Troina river | San Teodoro (ME)            | May-2015          | MG547785                                       |
|                                | R30K22a      | Water      |                                                    | Fiumefreddo RNR                        | Fiumefreddo river     | Fiumefreddo di Sicilia (CT) | May-2015          | MG547788                                       |
|                                | R30K9a       | Water      |                                                    | Fiumefreddo RNR                        | Fiumefreddo river     | Fiumefreddo di Sicilia (CT) | May-2015          | MG547789                                       |
|                                | R31K11c      | Water      |                                                    | Fiumefreddo RNR                        | Fiumefreddo river     | Fiumefreddo di Sicilia (CT) | May-2015          | MG547790                                       |
|                                | R31K11x      | Water      |                                                    | Fiumefreddo RNR                        | Fiumefreddo river     | Fiumefreddo di Sicilia (CT) | May-2015          | MG547791                                       |
|                                | R31K4b       | Water      |                                                    | Fiumefreddo RNR                        | Fiumefreddo river     | Fiumefreddo di Sicilia (CT) | May-2015          | MG547792                                       |
|                                | R31K7y       | Water      |                                                    | Fiumefreddo RNR                        | Fiumefreddo river     | Fiumefreddo di Sicilia (CT) | May-2015          | MG547793                                       |
|                                | R32K13       | Water      |                                                    | Agrò SCI                               | Fiumara d'Agrò river  | Limina (ME)                 | May-2015          | MG547794                                       |
|                                | R32K6b       | Water      |                                                    | Agrò SCI                               | Fiumara d'Agrò river  | Limina (ME)                 | May-2015          | MG547795                                       |
|                                | R32K7a       | Water      |                                                    | Agrò SCI                               | Fiumara d'Agrò river  | Limina (ME)                 | May-2015          | MG547796                                       |
|                                | R32K7b       | Water      |                                                    | Agrò SCI                               | Fiumara d'Agrò river  | Limina (ME)                 | May-2015          | MG547797                                       |
|                                | R35K9-3      | Water      |                                                    | Fiumedinisi RNR                        | Fiumedinisi river     | Fiumedinisi (ME)            | May-2015          | MG547798                                       |
|                                | R35K15       | Water      |                                                    | Fiumedinisi RNR                        | Fiumedinisi river     | Fiumedinisi (ME)            | May-2015          | MG547799                                       |
|                                | R35K19b      | Water      |                                                    | Fiumedinisi RNR                        | Fiumedinisi river     | Fiumedinisi (ME)            | May-2015          | MG547800                                       |
|                                | R35K19e      | Water      |                                                    | Fiumedinisi RNR                        | Fiumedinisi river     | Fiumedinisi (ME)            | May-2015          | MG547801                                       |
| <i>P. megasperma</i>           | VI/2d        | Rhiz. Soil | <i>Fagus sylvatica</i>                             | Nebrodi RP                             | Mountain forest       | Militello Rosmarino (ME)    | May-2013          | MG554738                                       |
|                                | XIII/1Kb     | Rhiz. Soil | <i>F. oxycarpa</i>                                 | Ciane RNR                              | Riparian forest       | Siracusa (SR)               | Mar-2015          | MG554739                                       |
|                                | 17/3K2b      | Rhiz. Soil | <i>Q. suber</i>                                    | Madonie RP                             | Mesophilic forest     | Geraci Siculo (PA)          | May-2015          | MG554740                                       |
|                                | 17/3K3bB     | Rhiz. Soil | <i>Q. suber</i>                                    | Madonie RP                             | Mesophilic forest     | Geraci Siculo (PA)          | May-2015          | MG554741                                       |
| <i>P. multivora</i>            | I/1a         | Rhiz. Soil | <i>Q. ilex</i>                                     | Etna RP                                | Mesophilic forest     | Zafferana Etnea (CT)        | May-2013          | MG557690                                       |
|                                | I/1aPLU      | Rhiz. Soil | <i>Q. ilex</i>                                     | Etna RP                                | Mesophilic forest     | Zafferana Etnea (CT)        | May-2013          | MG557691                                       |
|                                | I/1b         | Rhiz. Soil | <i>Q. ilex</i>                                     | Etna RP                                | Mesophilic forest     | Zafferana Etnea (CT)        | May-2013          | MG557692                                       |
|                                | I/1bPLU      | Rhiz. Soil | <i>Q. ilex</i>                                     | Etna RP                                | Mesophilic forest     | Zafferana Etnea (CT)        | May-2013          | MG557693                                       |
|                                | I/1cPLU      | Rhiz. Soil | <i>Q. ilex</i>                                     | Etna RP                                | Mesophilic forest     | Zafferana Etnea (CT)        | May-2013          | MG557694                                       |
|                                | I/1L2        | Rhiz. Soil | <i>Q. ilex</i>                                     | Etna RP                                | Mesophilic forest     | Zafferana Etnea (CT)        | May-2013          | MG557695                                       |
|                                | I/1L2PLU     | Rhiz. Soil | <i>Q. ilex</i>                                     | Etna RP                                | Mesophilic forest     | Zafferana Etnea (CT)        | May-2013          | MG557696                                       |
|                                | I/1L4        | Rhiz. Soil | <i>Q. ilex</i>                                     | Etna RP                                | Mesophilic forest     | Zafferana Etnea (CT)        | May-2013          | MG557697                                       |
|                                | I/1L4PLU     | Rhiz. Soil | <i>Q. ilex</i>                                     | Etna RP                                | Mesophilic forest     | Zafferana Etnea (CT)        | May-2013          | MG557698                                       |
|                                | XV/3K1       | Rhiz. Soil | <i>P. orientalis</i>                               | Cavagrande RNR                         | Riparian forest       | Siracusa (SR)               | Apr-2015          | MG557699                                       |
|                                | XV/5K2a      | Rhiz. Soil | <i>P. orientalis</i>                               | Cavagrande RNR                         | Riparian forest       | Siracusa (SR)               | Apr-2015          | MG557700                                       |
|                                | R7K1         | Water      |                                                    | Ciane RNR                              | Ciane river           | Siracusa (SR)               | Apr-2015          | MG557702                                       |
|                                | R30K4a       | Water      |                                                    | Fiumefreddo RNR                        | Fiumefreddo river     | Fiumefreddo di Sicilia (CT) | May-2015          | MG557701                                       |
| <i>P. plurivora</i>            | XI/3K11b     | Rhiz. Soil | <i>Q. ilex</i> + <i>F. oxycarpa</i> , mixed sample | Pantalica RNR                          | Riparian forest       | Sortino (SR)                | Mar-2015          | MG561728                                       |

| <i>Phytophthora</i><br>species | Isolate code | Source     | Host                                                 | Protected Natural<br>Area <sup>a</sup> | Forest type/river    | Municipality                | Isolation<br>date | GenBank<br>accession<br>no. of ITS<br>sequence |
|--------------------------------|--------------|------------|------------------------------------------------------|----------------------------------------|----------------------|-----------------------------|-------------------|------------------------------------------------|
| <i>P. plurivora</i>            | XI/4K2       | Rhiz. Soil | <i>P.orientalis</i>                                  | Pantalica RNR                          | Riparian forest      | Sortino (SR)                | Mar-2015          | MG561729                                       |
|                                | XI/4K3       | Rhiz. Soil | <i>P.orientalis</i>                                  | Pantalica RNR                          | Riparian forest      | Sortino (SR)                | Mar-2015          | MG561730                                       |
|                                | XI/5K2b      | Rhiz. Soil | <i>Ostrya carpinifolia</i>                           | Pantalica RNR                          | Riparian forest      | Sortino (SR)                | Mar-2015          | MG561731                                       |
|                                | XI/6K1       | Rhiz. Soil | <i>P. orientalis</i> + <i>Q. ilex</i> , mixed sample | Pantalica RNR                          | Riparian forest      | Sortino (SR)                | Mar-2015          | MG561732                                       |
|                                | XI/6Ka2      | Rhiz. Soil | <i>P. orientalis</i> + <i>Q. ilex</i> , mixed sample | Pantalica RNR                          | Riparian forest      | Sortino (SR)                | Mar-2015          | MG561733                                       |
|                                | XII/1K1a     | Rhiz. Soil | <i>P.nigra</i>                                       | Pantalica RNR                          | Riparian forest      | Sortino (SR)                | Mar-2015          | MG561734                                       |
|                                | XII/1K1b     | Rhiz. Soil | <i>P.nigra</i>                                       | Pantalica RNR                          | Riparian forest      | Sortino (SR)                | Mar-2015          | MG561735                                       |
|                                | XII/1K2      | Rhiz. Soil | <i>P.nigra</i>                                       | Pantalica RNR                          | Riparian forest      | Sortino (SR)                | Mar-2015          | MG561736                                       |
|                                | XII/1K5b     | Rhiz. Soil | <i>P.nigra</i>                                       | Pantalica RNR                          | Riparian forest      | Sortino (SR)                | Mar-2015          | MG561737                                       |
|                                | XII/4Ka      | Rhiz. Soil | <i>Q. ilex</i>                                       | Pantalica RNR                          | Riparian forest      | Sortino (SR)                | Mar-2015          | MG561738                                       |
|                                | XII/6K1b     | Rhiz. Soil | <i>Q. ilex</i>                                       | Pantalica RNR                          | Riparian forest      | Sortino (SR)                | Mar-2015          | MG561739                                       |
|                                | XII/6K1c     | Rhiz. Soil | <i>Q. ilex</i>                                       | Pantalica RNR                          | Riparian forest      | Sortino (SR)                | Mar-2015          | MG561740                                       |
|                                | XIII/1K2     | Rhiz. Soil | <i>F.oxycarpa</i>                                    | Ciane RNR                              | Riparian forest      | Siracusa (SR)               | Mar-2015          | MG561741                                       |
|                                | XIII/2K13a   | Rhiz. Soil | <i>F.oxycarpa</i>                                    | Ciane RNR                              | Riparian forest      | Siracusa (SR)               | Mar-2015          | MG561742                                       |
|                                | XV/5K4       | Rhiz. Soil | <i>P.orientalis</i>                                  | Cavagrande RNR                         | Riparian forest      | Siracusa (SR)               | Apr-2015          | MG561743                                       |
|                                | XVI/1K2      | Rhiz. Soil | <i>F. oxycarpa</i>                                   | Irminio SCI                            | Riparian forest      | Ragusa (RG)                 | Apr-2015          | MG561744                                       |
|                                | XVI/2Ka      | Rhiz. Soil | <i>F. oxycarpa</i>                                   | Irminio SCI                            | Riparian forest      | Ragusa (RG)                 | Apr-2015          | MG561745                                       |
|                                | XVI/2Kc      | Rhiz. Soil | <i>Q. pubescens</i> s. l.                            | Irminio SCI                            | Riparian forest      | Ragusa (RG)                 | Apr-2015          | MG561746                                       |
|                                | XVI/2Kd2     | Rhiz. Soil | <i>Q. pubescens</i> s. l.                            | Irminio SCI                            | Riparian forest      | Ragusa (RG)                 | Apr-2015          | MG561747                                       |
|                                | XVI/2Q3      | Rhiz. Soil | <i>Q. pubescens</i> s. l.                            | Irminio SCI                            | Riparian forest      | Ragusa (RG)                 | Apr-2015          | MG561748                                       |
|                                | XVI/3Ka      | Rhiz. Soil | <i>Q. pubescens</i> s. l.                            | Irminio SCI                            | Riparian forest      | Ragusa (RG)                 | Apr-2015          | MG561749                                       |
|                                | XVI/4Q1a     | Rhiz. Soil | <i>P. orientalis</i>                                 | Irminio SCI                            | Riparian forest      | Ragusa (RG)                 | Apr-2015          | MG561750                                       |
|                                | 21/4F2a      | Rhiz. Soil | <i>Castanea sativa</i>                               | Madonie RP                             | Mountain forest      | Castelbuono (PA)            | May 2015          | MG561726                                       |
|                                | 21/4K1b      | Rhiz. Soil | <i>C. sativa</i>                                     | Madonie RP                             | Mountain forest      | Castelbuono (PA)            | May 2015          | MG561727                                       |
|                                | R30K1a       | Water      |                                                      | Fiumefreddo RNR                        | Fiumefreddo river    | Fiumefreddo di Sicilia (CT) | May-2015          | MG557901                                       |
|                                | R32K5a       | Water      |                                                      | Agrò SCI                               | Fiumara d'Agrò river | Limina (ME)                 | May-2015          | MG557902                                       |
| <i>P. polonica</i>             | XII/5Kc      | Rhiz. soil | <i>C. australis</i>                                  | Pantalica RNR                          | Riparian forest      | Sortino (SR)                | Mar-2015          | MG594445                                       |
|                                | XV/2K5       | Rhiz. soil | <i>S. caprea</i>                                     | Cavagrande RNR                         | Riparian forest      | Siracusa (SR)               | Apr-2015          | MG594446                                       |
| <i>P. pseudocryptogea</i>      | XI/1K7b      | Rhiz. soil | <i>Populus nigra</i>                                 | Pantalica RNR                          | Riparian forest      | Sortino (SR)                | Mar-2015          | MG589423                                       |
|                                | XI/1K2       | Rhiz. soil | <i>P. nigra</i>                                      | Pantalica RNR                          | Riparian forest      | Sortino (SR)                | Mar-2015          | MG589424                                       |
|                                | XI/1K6a      | Rhiz. soil | <i>P. nigra</i>                                      | Pantalica RNR                          | Riparian forest      | Sortino (SR)                | Mar-2015          | MG589425                                       |
|                                | XI/2K1c      | Rhiz. soil | <i>Salix pedicellata</i>                             | Pantalica RNR                          | Riparian forest      | Sortino (SR)                | Mar-2015          | MG589426                                       |
|                                | XI/2K4a      | Rhiz. soil | <i>S. pedicellata</i>                                | Pantalica RNR                          | Riparian forest      | Sortino (SR)                | Mar-2015          | MG589427                                       |
|                                | XI/3K1c      | Rhiz. soil | <i>Q. ilex</i> + <i>F. oxycarpa</i> , mixed sample   | Pantalica RNR                          | Riparian forest      | Sortino (SR)                | Mar-2015          | MG589428                                       |
|                                | XI/3K5b      | Rhiz. soil | <i>Q. ilex</i> + <i>F. oxycarpa</i> , mixed sample   | Pantalica RNR                          | Riparian forest      | Sortino (SR)                | Mar-2015          | MG589429                                       |
|                                | XI/3K8b      | Rhiz. soil | <i>Q. ilex</i> + <i>F. oxycarpa</i> , mixed sample   | Pantalica RNR                          | Riparian forest      | Sortino (SR)                | Mar-2015          | MG589430                                       |
|                                | XII/2K1a     | Rhiz. soil | <i>Populus alba</i>                                  | Pantalica RNR                          | Riparian forest      | Sortino (SR)                | Mar-2015          | MG589431                                       |
|                                | XII/2K2b     | Rhiz. soil | <i>P. alba</i>                                       | Pantalica RNR                          | Riparian forest      | Sortino (SR)                | Mar-2015          | MG589432                                       |

| <i>Phytophthora</i><br>species | Isolate code | Source     | Host                  | Protected Natural<br>Area <sup>a</sup> | Forest type/river    | Municipality                | Isolation<br>date | GenBank<br>accession<br>no. of ITS<br>sequence |
|--------------------------------|--------------|------------|-----------------------|----------------------------------------|----------------------|-----------------------------|-------------------|------------------------------------------------|
| <i>P. pseudocryptogea</i>      | XII/2K5a     | Rhiz. soil | <i>P. alba</i>        | Pantalica RNR                          | Riparian forest      | Sortino (SR)                | Mar-2015          | MG589433                                       |
|                                | XII/2K7a     | Rhiz. soil | <i>P. alba</i>        | Pantalica RNR                          | Riparian forest      | Sortino (SR)                | Mar-2015          | MG589434                                       |
|                                | XII/2K7b     | Rhiz. soil | <i>P. alba</i>        | Pantalica RNR                          | Riparian forest      | Sortino (SR)                | Mar-2015          | MG589435                                       |
|                                | XII/2K9b     | Rhiz. soil | <i>P. alba</i>        | Pantalica RNR                          | Riparian forest      | Sortino (SR)                | Mar-2015          | MG589436                                       |
|                                | XII/2K9d     | Rhiz. Soil | <i>P. alba</i>        | Pantalica RNR                          | Riparian forest      | Sortino (SR)                | Mar-2015          | MG589437                                       |
|                                | XII/3Aa      | Rhiz. Soil | <i>S. pedicellata</i> | Pantalica RNR                          | Riparian forest      | Sortino (SR)                | Mar-2015          | MG589438                                       |
|                                | XII/3K10     | Rhiz. Soil | <i>S. pedicellata</i> | Pantalica RNR                          | Riparian forest      | Sortino (SR)                | Mar-2015          | MG589439                                       |
|                                | XII/3K1c     | Rhiz. Soil | <i>S. pedicellata</i> | Pantalica RNR                          | Riparian forest      | Sortino (SR)                | Mar-2015          | MG589440                                       |
|                                | XII/3K7      | Rhiz. Soil | <i>S. pedicellata</i> | Pantalica RNR                          | Riparian forest      | Sortino (SR)                | Mar-2015          | MG589441                                       |
|                                | XII/6K1a     | Rhiz. Soil | <i>Q. ilex</i>        | Pantalica RNR                          | Riparian forest      | Sortino (SR)                | Mar-2015          | MG589442                                       |
|                                | XIII/2K3b    | Rhiz. Soil | <i>F. oxycarpa</i>    | Ciane RNR                              | Riparian forest      | Siracusa (SR)               | Mar-2015          | MG589443                                       |
|                                | XIII/3K10    | Rhiz. Soil | <i>F. oxycarpa</i>    | Ciane RNR                              | Riparian forest      | Siracusa (SR)               | Mar-2015          | MG589444                                       |
|                                | XIII/3K11b   | Rhiz. Soil | <i>F. oxycarpa</i>    | Ciane RNR                              | Riparian forest      | Siracusa (SR)               | Mar-2015          | MG589445                                       |
|                                | XIII/4Pa1    | Rhiz. Soil | <i>F. oxycarpa</i>    | Ciane RNR                              | Riparian forest      | Siracusa (SR)               | Mar-2015          | MG589446                                       |
|                                | XV/3K2       | Rhiz. Soil | <i>P. orientalis</i>  | Cavagrande RNR                         | Riparian forest      | Siracusa (SR)               | Apr-2015          | MG589447                                       |
|                                | XV/4K1       | Rhiz. Soil | <i>P. orientalis</i>  | Cavagrande RNR                         | Riparian forest      | Siracusa (SR)               | Apr-2015          | MG589448                                       |
|                                | XV/4K4       | Rhiz. Soil | <i>P. orientalis</i>  | Cavagrande RNR                         | Riparian forest      | Siracusa (SR)               | Apr-2015          | MG589449                                       |
|                                | XV/4Q3       | Rhiz. Soil | <i>P. orientalis</i>  | Cavagrande RNR                         | Riparian forest      | Siracusa (SR)               | Apr-2015          | MG589450                                       |
|                                | XV/5K1       | Rhiz. Soil | <i>P. orientalis</i>  | Cavagrande RNR                         | Riparian forest      | Siracusa (SR)               | Apr-2015          | MG589451                                       |
|                                | XVI/1K1      | Rhiz. Soil | <i>F. oxycarpa</i>    | Irminio SCI                            | Riparian forest      | Ragusa (RG)                 | Apr-2015          | MG589452                                       |
|                                | R3K3         | Water      |                       | Pantalica RNR                          | Anapo river          | Sortino (SR)                | Mar-2015          | MG587721                                       |
|                                | R3K6a        | Water      |                       | Pantalica RNR                          | Anapo river          | Sortino (SR)                | Mar-2015          | MG587722                                       |
|                                | R5K1         | Water      |                       | Ciane RNR                              | Ciane river          | Siracusa (SR)               | Mar-2015          | MG587723                                       |
|                                | R5K3b        | Water      |                       | Ciane RNR                              | Ciane river          | Siracusa (SR)               | Mar-2015          | MG587724                                       |
|                                | R5P1a        | Water      |                       | Ciane RNR                              | Ciane river          | Siracusa (SR)               | Mar-2015          | MG587725                                       |
|                                | R8K3a        | Water      |                       | Ciane RNR                              | Ciane river          | Siracusa (SR)               | Mar-2015          | MG587726                                       |
|                                | R13K6        | Water      |                       | Cavagrande RNR                         | Cassibile river      | Siracusa (SR)               | Apr-2015          | MG587712                                       |
|                                | R30K12a      | Water      |                       | Fiumefreddo RNR                        | Fiumefreddo river    | Fiumefreddo di Sicilia (CT) | May-2015          | MG587713                                       |
|                                | R30K19a1     | Water      |                       | Fiumefreddo RNR                        | Fiumefreddo river    | Fiumefreddo di Sicilia (CT) | May-2015          | MG587714                                       |
|                                | R31K10b      | Water      |                       | Fiumefreddo RNR                        | Fiumefreddo river    | Fiumefreddo di Sicilia (CT) | May-2015          | MG587715                                       |
|                                | R31K11b1     | Water      |                       | Fiumefreddo RNR                        | Fiumefreddo river    | Fiumefreddo di Sicilia (CT) | May-2015          | MG587716                                       |
|                                | R31K11b      | Water      |                       | Fiumefreddo RNR                        | Fiumefreddo river    | Fiumefreddo di Sicilia (CT) | May-2015          | MG587717                                       |
|                                | R31K6a       | Water      |                       | Fiumefreddo RNR                        | Fiumefreddo river    | Fiumefreddo di Sicilia (CT) | May-2015          | MG587718                                       |
|                                | R31K7b       | Water      |                       | Fiumefreddo RNR                        | Fiumefreddo river    | Fiumefreddo di Sicilia (CT) | May-2015          | MG587719                                       |
|                                | R32K9a       | Water      |                       | Agrò SCI                               | Fiumara d'Agrò river | Limina (ME)                 | May-2015          | MG587720                                       |
| <i>P. quercina</i>             | XX/4F2a      | Rhiz. soil | <i>Q. ilex</i>        | Madonie RP                             | Mesophilic forest    | Castelbuono (PA)            | May-2015          | MG595666                                       |
|                                | XX/4F2b      | Rhiz. soil | <i>Q. ilex</i>        | Madonie RP                             | Mesophilic forest    | Castelbuono (PA)            | May-2015          | MG595667                                       |
| <i>P. sp. kelmania</i>         | XII/2K12a2   | Rhiz. Soil | <i>P. alba</i>        | Pantalica RNR                          | Riparian forest      | Sortino (SR)                | Mar-2015          | MG594856                                       |
|                                | R5P6         | Water      |                       | Ciane RNR                              | Ciane river          | Siracusa (SR)               | Mar-2015          | MG595272                                       |

| <i>Phytophthora</i><br>species | Isolate code | Source     | Host                           | Protected Natural<br>Area <sup>a</sup> | Forest type/river    | Municipality                | Isolation<br>date | GenBank<br>accession<br>no. of ITS<br>sequence |
|--------------------------------|--------------|------------|--------------------------------|----------------------------------------|----------------------|-----------------------------|-------------------|------------------------------------------------|
| <i>P. thermophila</i>          | R30K19a2     | Water      |                                | Fiumefreddo RNR                        | Fiumefreddo river    | Fiumefreddo di Sicilia (CT) | May-2015          | MG561944                                       |
|                                | R31K7c1      | Water      |                                | Fiumefreddo RNR                        | Fiumefreddo river    | Fiumefreddo di Sicilia (CT) | May-2015          | MG561945                                       |
|                                | R31K8a       | Water      |                                | Fiumefreddo RNR                        | Fiumefreddo river    | Fiumefreddo di Sicilia (CT) | May-2015          | MG561946                                       |
|                                | R31K7c       | Water      |                                | Fiumefreddo RNR                        | Fiumefreddo river    | Fiumefreddo di Sicilia (CT) | May-2015          | MG561947                                       |
| <i>P. tyrrhenica</i>           | 20/6K10a     | Rhiz. soil | <i>Q. ilex</i>                 | Madonie RP                             | Mesophilic forest    | Castelbuono (PA)            | May-2015          | MG595633                                       |
|                                | 206K10b      | Rhiz. soil | <i>Q. ilex</i>                 | Madonie RP                             | Mesophilic forest    | Castelbuono (PA)            | May-2015          | MG595634                                       |
|                                | 20/6K10c     | Rhiz. soil | <i>Q. ilex</i>                 | Madonie RP                             | Mesophilic forest    | Castelbuono (PA)            | May-2015          | MG595635                                       |
|                                | 20/6K10d     | Rhiz. soil | <i>Q. ilex</i>                 | Madonie RP                             | Mesophilic forest    | Castelbuono (PA)            | May-2015          | MG595636                                       |
|                                | 20/6K10e     | Rhiz. soil | <i>Q. ilex</i>                 | Madonie RP                             | Mesophilic forest    | Castelbuono (PA)            | May-2015          | MG595637                                       |
|                                | 20/6K10f     | Rhiz. soil | <i>Q. ilex</i>                 | Madonie RP                             | Mesophilic forest    | Castelbuono (PA)            | May-2015          | MG595638                                       |
|                                | 20/6K10g     | Rhiz. soil | <i>Q. ilex</i>                 | Madonie RP                             | Mesophilic forest    | Castelbuono (PA)            | May-2015          | MG595639                                       |
| <i>P. vulcanica</i>            | X3b          | Rhiz. soil | <i>F. sylvatica</i>            | Etna RP                                | Mountain forest      | Castiglione di Sicilia (CT) | May-2013          | MG603591                                       |
| <i>P. xcambivora</i>           | V/3+4B       | Rhiz. soil | <i>Quercus pubescens</i> s. l. | Etna RP                                | Mesophilic forest    | Zafferana Etnea (CT)        | May-2013          | MG594277                                       |
|                                | V/3+4CIN     | Rhiz. soil | <i>Q. pubescens</i> s. l.      | Etna RP                                | Mesophilic forest    | Zafferana Etnea (CT)        | May-2013          | MG594278                                       |
|                                | V/3+4L2      | Rhiz. soil | <i>Q. pubescens</i> s. l.      | Etna RP                                | Mesophilic forest    | Zafferana Etnea (CT)        | May-2013          | MG594279                                       |
|                                | V/3+4L7      | Rhiz. soil | <i>Q. pubescens</i> s. l.      | Etna RP                                | Mesophilic forest    | Zafferana Etnea (CT)        | May-2013          | MG594280                                       |
|                                | VI/1a        | Rhiz. soil | <i>Fagus sylvatica</i>         | Nebrodi RP                             | Mountain forest      | Militello Rosmarino (ME)    | May-2013          | MG594281                                       |
|                                | VI/4a        | Rhiz. soil | <i>F. sylvatica</i>            | Nebrodi RP                             | Mountain forest      | Militello Rosmarino (ME)    | May-2013          | MG594282                                       |
|                                | VI/5         | Rhiz. soil | <i>Q. pubescens</i> s. l.      | Nebrodi RP                             | Mountain forest      | Militello Rosmarino (ME)    | May-2013          | MG594283                                       |
|                                | VI/8a        | Rhiz. soil | <i>F. sylvatica</i>            | Nebrodi RP                             | Mountain forest      | Militello Rosmarino (ME)    | May-2013          | MG594284                                       |
|                                | VI/8b        | Rhiz. soil | <i>F. sylvatica</i>            | Nebrodi RP                             | Mountain forest      | Militello Rosmarino (ME)    | May-2013          | MG594285                                       |
|                                | VII/aL5      | Rhiz. soil | <i>Quercus ilex</i>            | Nebrodi RP                             | Mountain forest      | San Fratello (ME)           | May-2013          | MG594286                                       |
|                                | 8/1C1        | Rhiz. soil | <i>F. sylvatica</i>            | Nebrodi RP                             | Mountain forest      | Randazzo (CT)               | May-2015          | MG594271                                       |
|                                | 8/1C5        | Rhiz. soil | <i>F. sylvatica</i>            | Nebrodi RP                             | Mountain forest      | Randazzo (CT)               | May-2015          | MG594272                                       |
|                                | 8/1K3        | Rhiz. soil | <i>F. sylvatica</i>            | Nebrodi RP                             | Mountain forest      | Randazzo (CT)               | May-2015          | MG594273                                       |
|                                | 8/9F5        | Rhiz. soil | <i>Quercus cerris</i>          | Nebrodi RP                             | Mountain forest      | Randazzo (CT)               | May-2015          | MG594274                                       |
|                                | 8/9K1        | Rhiz. soil | <i>Q. cerris</i>               | Nebrodi RP                             | Mountain forest      | Randazzo (CT)               | May-2015          | MG594275                                       |
|                                | IX/1Ka       | Rhiz. soil | <i>F. sylvatica</i>            | Nebrodi RP                             | Mountain forest      | Cesarò (ME)                 | May-2013          | MG594276                                       |
|                                | 18/3F5a      | Rhiz. soil | <i>Ilex aquifolium</i>         | Madonie RP                             | Mountain forest      | Petralia Sottana (PA)       | May-2015          | MG594267                                       |
|                                | 18/3K1b      | Rhiz. soil | <i>I. aquifolium</i>           | Madonie RP                             | Mountain forest      | Petralia Sottana (PA)       | May-2015          | MG594268                                       |
|                                | 19/1F3       | Rhiz. soil | <i>Q. pubescens</i> s. l.      | Madonie RP                             | Mountain forest      | Castelbuono (PA)            | May-2015          | MG594269                                       |
|                                | 19/1K1       | Rhiz. soil | <i>Q. pubescens</i> s. l.      | Madonie RP                             | Mountain forest      | Castelbuono (PA)            | May-2015          | MG594270                                       |
|                                | R22C4b       | Water      |                                | Nebrodi RP                             | Della Saracena river | Bronte (CT)                 | May-2015          | MH382111                                       |

<sup>a</sup> Etna RP = Etna Regional Park; Nebrodi RP = Nebrodi Regional Park; Madonie RP = Madonie Regional Park; Pantalica RNR = Pantalica, Valle dell'Anapo e Torrente Cavagrande Regional Natural Reserve (RNR); Ciane RNR = Fiume Ciane e Saline di Siracusa RNR; Cavagrande RNR = Cavagrande del Cassibile RNR; Fiumedinisi RNR = Fiume Fiumedinisi e Monte Scuderi RNR; Agrò SCI = ITA030019 Tratto Montano del Bacino della Fiumara di Agrò Site of Community Importance (SCI); Irminio SCI = ITA080002 Alto corso del Fiume Irminio SCI.
